# Supplementary material
Source: MDPI journal article supplement (https://www.mdpi.com/2673-4591/37/1/96)
Supplement: s1 [file s1]

## Supplementary Information

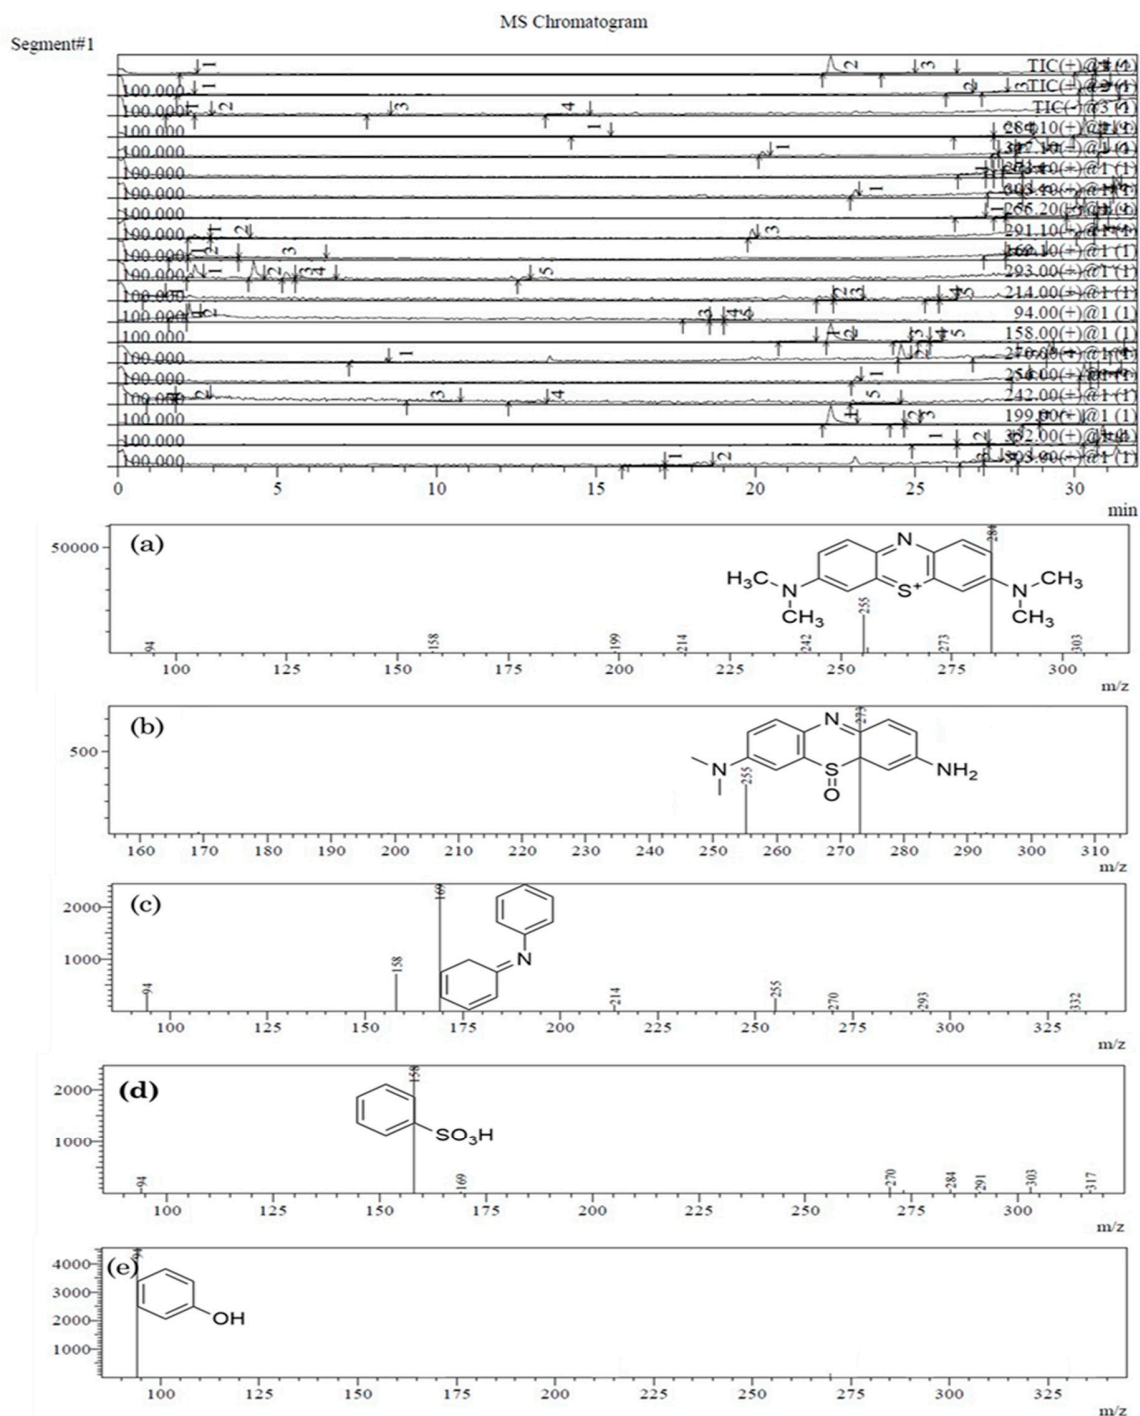

**Figure S1.** The Mass spectrometry peaks (m/z) of generated reaction intermediate during the photodegradation of MB dye with (a) 284 m/z, (b) 273 m/z, (c) 169 m/z, (d) 158 m/z, (e) 94 m/z.

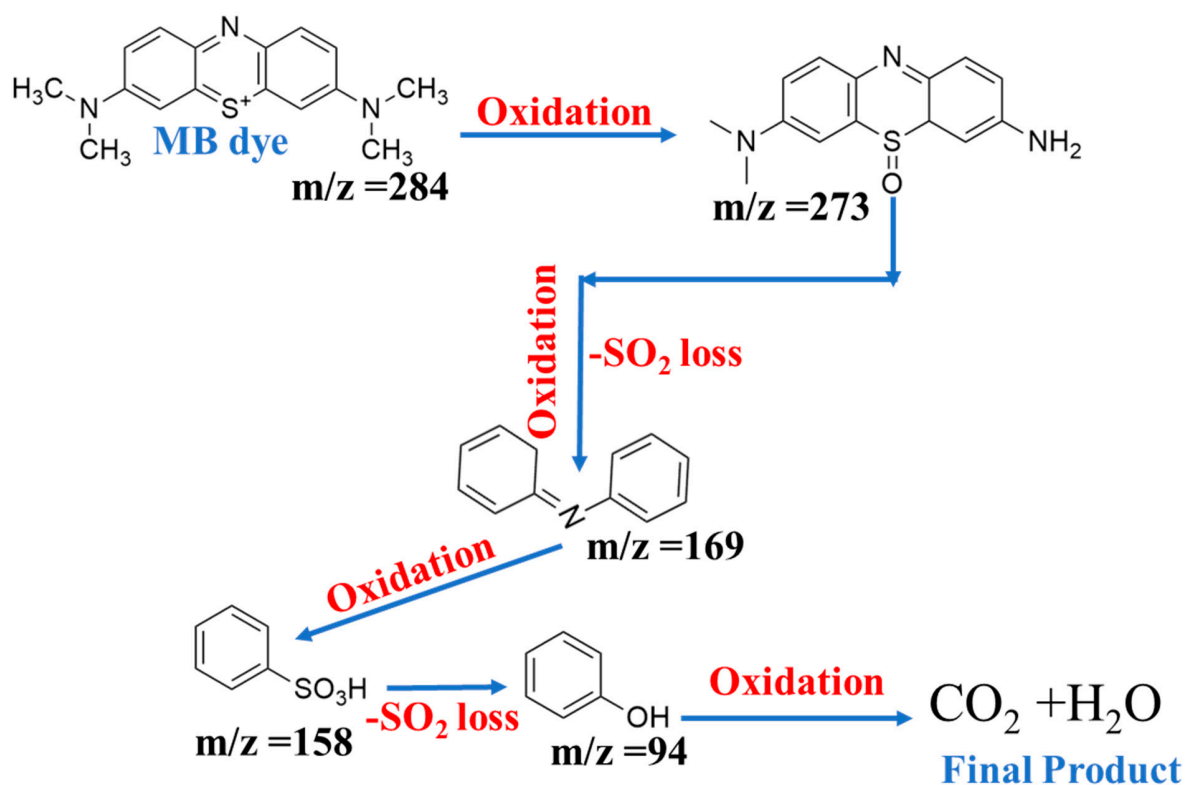

**Figure S2.** Identified transformation products and proposed photodegradation pathway of MB dye using ACPNS-TiO<sub>2</sub> nanocomposite catalyst.
